# Supplementary material for: Multidimensional Clinical Phenotyping of an Adult Cystic Fibrosis Patient Population
Source: PubMed Central journal article supplement (PMC4378917; doi:10.1371/journal.pone.0122705), 2015-03-30
Supplement: pone.0122705.s005.pdf [file pone.0122705.s005.pdf]

|                                    | <u>FEV1%</u> | <u>FVC%</u> | <u>Brasfield</u> | <u>Age</u> | <u>Age*FEV1% product</u> | <u>BMI</u> | <u>f Male</u> |
|------------------------------------|--------------|-------------|------------------|------------|--------------------------|------------|---------------|
| <b><u>FEV1% quintile</u></b>       |              |             |                  |            |                          |            |               |
| <b>1 (n=42)</b>                    | 26.5         | 49.2        | 11.4             | 36.3       | 948                      | 20.1       | 0.66          |
| <b>2 (n=42)</b>                    | 46.3         | 69.1        | 13.8             | 34.3       | 1589                     | 21.3       | 0.46          |
| <b>3 (n=42)</b>                    | 61.6         | 81.1        | 16.0             | 33.8       | 2081                     | 22.6       | 0.58          |
| <b>4 (n=43)</b>                    | 75.0         | 90.2        | 16.8             | 31.2       | 2351                     | 23.2       | 0.63          |
| <b>5 (n=42)</b>                    | 94.5         | 103         | 18.7             | 29.0       | 2753                     | 23.4       | 0.30          |
|                                    |              |             |                  |            |                          |            |               |
| <b><u>A*FEV1 prod quintile</u></b> |              |             |                  |            |                          |            |               |
| <b>1 (n=43)</b>                    | 28.5         | 49.3        | 11.6             | 31.4       | 854                      | 19.5       | 0.60          |
| <b>2 (n=42)</b>                    | 52.3         | 70.9        | 14.6             | 29.6       | 1419                     | 21.6       | 0.43          |
| <b>3 (n=42)</b>                    | 61.1         | 82.2        | 15.0             | 31.3       | 1801                     | 22.3       | 0.55          |
| <b>4 (n=42)</b>                    | 79.9         | 94.0        | 17.3             | 29.6       | 2279                     | 22.4       | 0.50          |
| <b>5 (n=42)</b>                    | 80.4         | 95.0        | 17.8             | 43.1       | 3331                     | 24.8       | 0.57          |
