# Supplementary material for: Multidimensional Clinical Phenotyping of an Adult Cystic Fibrosis Patient Population
Source: PubMed Central journal article supplement (PMC4378917; doi:10.1371/journal.pone.0122705), 2015-03-30
Supplement: pone.0122705.s006.pdf [file pone.0122705.s006.pdf]

|                              | quintile | PS | CFTR Class IV,V,VI | PA           | Candida       | PA/Candida    |
|------------------------------|----------|----|--------------------|--------------|---------------|---------------|
| <b>FEV1%</b>                 | 1        |    |                    | 2.8 (p=.04)  | 4.7 (p=.001)  | 5.2 (p=.0005) |
|                              | 2        |    |                    |              |               |               |
|                              | 3        |    |                    |              |               |               |
|                              | 4        |    |                    | .38 (p=.03)  |               |               |
|                              | 5        |    |                    | .33 (p=.01)  | .11 (p=.02)   |               |
|                              | quintile |    |                    |              |               |               |
| <b>Age*FEV1%<br/>product</b> | 1        |    |                    |              | 5.7 (p=.0001) | 6.4 (p=.0001) |
|                              | 2        |    |                    |              |               |               |
|                              | 3        |    |                    |              |               |               |
|                              | 4        |    |                    | .28 (p=.002) |               |               |
|                              | 5        |    |                    |              | .10 (p=.01)   | .12 (p=.03)   |
